# Supplementary material for: Malignant Rhabdoid Tumor, an Aggressive Tumor Often Misclassified as Small Cell Variant of Hepatoblastoma
Source: PubMed Central journal article supplement (PMC6966472; doi:10.3390/cancers11121992), 2019-12-11
Supplement: cancers-11-01992-s001.pdf [file cancers-11-01992-s001.pdf]

# Malignant Rhabdoid Tumor, an Aggressive Tumor Often Misclassified as Small Cell Variant of Hepatoblastoma

Ladan Fazlollahi, Susan J. Hsiao, Manpreet Kochhar, Mahesh M. Mansukhani, Darrell J. Yamashiro and Helen E. Remotti

**Table S1.** List of genes included in Columbia Combined Cancer Panel (CCCP) panel.

| COLUMBIA COMBINED CANCER PANEL (CCCP) EXONS ONLY  |        |         |         |           |          |         |        |         |         |         |          |       |
|---------------------------------------------------|--------|---------|---------|-----------|----------|---------|--------|---------|---------|---------|----------|-------|
| AKT1                                              | BMP1A  | CDC45   | EPHA3   | FLCN      | IDH1     | KMT2C   | MRE11A | PDGFRA  | PTPRD   | SDHB    | STAT3    | WRN   |
| AKT2                                              | BRCA1  | CEBPA   | EPHA5   | FLT1      | IDH2     | KMT2D   | MSH2   | PDPK1   | PTPRS   | SDHC    | STAT5B   | WT1   |
| AKT3                                              | BRCA2  | CHEK1   | EPHB1   | FLT3      | IFNGR1   | KRAS    | MSH6   | PHF6    | PTPRT   | SDHD    | STAT6    | XIAP  |
| ALOX12B                                           | BRCC3  | CHEK2   | ERBB2   | FLT4      | IGF1     | LAMB4   | MTOR   | PHF8    | PTTG1   | SETBP1  | STK11    | XPA   |
| AMER1                                             | BRIP1  | CNOT3   | ERBB3   | FOXA1     | IGF1R    | LATS1   | MUTYH  | PHOX2B  | RAC1    | SETD2   | STK40    | XPC   |
| APC                                               | BTIK   | CREBBP  | ERBB4   | FOX12     | IGF2     | LATS2   | MYC    | PIGA    | RAD21   | SF1     | SUFU     | XPO1  |
| AR                                                | BUB1B  | CRKL    | ERCC2   | FUBP1     | IKBKE    | LMO1    | MYCL   | PIK3C2G | RAD50   | SF3A1   | TP53BP1  | YAP1  |
| ARAF                                              | CALR   | CRLF2   | ERCC3   | FYN       | IL10     | LUC7L2  | MYCN   | PIK3C3  | RAD51   | SF3B1   | TBL1XR1  | YES1  |
| ARID1A                                            | CARD11 | CSF1R   | ERCC4   | GATA1     | IL6ST    | MAP2K1  | MYD88  | PIK3CA  | RAD51B  | SH2B3   | TBX3     | ZRSR2 |
| ARID1B                                            | CASP8  | CSF3R   | ERCC5   | GATA2     | IL7R     | MAP2K2  | MYO1D1 | PIK3CB  | RAD51C  | SH2D1A  | TCF3     |       |
| ARID2                                             | CBLB   | CTCF    | ESR1    | GATA3     | INPP4A   | MAP2K4  | NBN    | PIK3CD  | RAD51D  | SHQ1    | TERT     |       |
| ARID5B                                            | CBLC   | CTLA4   | EXT1    | GMNN      | INPP4B   | MAP3K1  | NCOR1  | PIK3CG  | RAD52   | SMAD2   | TET1     |       |
| ASXL1                                             | CCND3  | CUL3    | EXT2    | GNA11     | INSR     | MAP3K13 | NF1    | PIK3R1  | RAD54L  | SMAD3   | TET2     |       |
| ASXL2                                             | CCNE1  | CYLD    | EZH2    | GNA13     | IRF1     | MAPK1   | NF2    | PIK3R2  | RASA1   | SMAD4   | TET3     |       |
| ATM                                               | CD276  | DAXX    | FAM175A | GNAQ      | IRF4     | MAX     | NFE2L2 | PIK3R3  | RB1     | SMARCA4 | TGFBFR1  |       |
| ATR                                               | CD58   | DCUN1D1 | FAM46C  | GNAS      | IRF8     | MCL1    | NIPBL  | PLK2    | RBM10   | SMARCB1 | TGFBFR2  |       |
| ATRX                                              | CDC6   | DDR2    | FANCA   | GNB1      | IRS1     | MCM2    | NKX2-1 | PMAIP1  | RECOL4  | SMARCD1 | TMEM127  |       |
| AURKA                                             | CDC7   | DDR2    | FANCC   | GOPC      | IRS2     | MCM3    | NKX3-1 | PMS1    | REL     | SMARCE1 | TNFAIP3  |       |
| AURKB                                             | CDC73  | DICER1  | FANCD2  | GREM1     | JAK1     | MCM4    | NOTCH1 | PMS2    | RFWD2   | SMC1A   | TNFRSF14 |       |
| AXIN1                                             | CDCA5  | DIS3    | FANCE   | GRID1     | JAK3     | MCM5    | NOTCH2 | PNRC1   | RHOA    | SMC3    | TOPBP1   |       |
| AXIN2                                             | CDH1   | DNM2    | FANCF   | GRIN2A    | JUN      | MCM6    | NOTCH3 | POLE    | RICTOR  | SMO     | TP53     |       |
| AXL                                               | CDK12  | DNMT1   | FANCG   | GSK3B     | KCNJ5    | MCM7    | NOTCH4 | POT1    | RIT1    | SOCS1   | TP63     |       |
| B2M                                               | CDK4   | DNMT3A  | FAS     | H3F3A     | KDM5C    | MDC1    | NRAS   | PPP2R1A | RNF43   | SOX17   | TRAF7    |       |
| BAP1                                              | CDK8   | DNMT3B  | FAT1    | H3F3C     | KDM6A    | MDM2    | NT5C2  | PRDM1   | RPL10   | SOX2    | TSC1     |       |
| BARD1                                             | CDKN1A | DOT1L   | FBXO11  | HGF       | KDM6B    | MDM4    | NTRK2  | PRF1    | RPL5    | SOX9    | TSC2     |       |
| BBC3                                              | CDKN1B | E2F3    | FBXW7   | HIST1H1C  | KDR      | MED12   | PAK1   | PRPF40B | RPS6KA4 | SPEN    | TSHR     |       |
| BCL11B                                            | CDKN2A | ECT2L   | FGF19   | HIST1H2BD | KEAP1    | MEF2B   | PAK7   | PRPF8   | RPS6KB2 | SPOP    | U2AF1    |       |
| BCL2L1                                            | CDKN2B | EED     | FGF3    | HIST1H3B  | KIAA1549 | MEN1    | PALB2  | PTCH1   | RPTOR   | SRC     | U2AF2    |       |
| BCL2L11                                           | CDKN2C | EGFL7   | FGF4    | HNFI1A    | KIT      | MET     | PARK2  | PTEN    | RYBP    | SRSF2   | UBR5     |       |
| BCL6                                              | CDT1   | EGFR    | FGFR2   | HRAS      | KLF4     | MITF    | PARP1  | PTPN1   | SBDS    | STAG1   | VHL      |       |
| BCORL1                                            | CD79A  | EIF1AX  | FGFR4   | ICOSLG    | KLF6     | MLH1    | PBRM1  | PTPN11  | SDHA    | STAG2   | VTCN1    |       |
| BLM                                               | CD79B  | EPCAM   | FH      | ID3       | KLHL6    | MPL     | PDCD1  | PTPRC   | SDHAF2  | STAG3   | WAS      |       |
| COLUMBIA COMBINED CANCER PANEL (CCCP) WHOLE GENES |        |         |         |           |          |         |        |         |         |         |          |       |
| ABL1                                              | BRD4   | CHIT1   | EP300   | EWSR1     | FUS      | KAT6A   | NPM1   | PAX5    | PPARG   | RUNX1   | SUZ12    | TPM3  |
| ALK                                               | CBL    | CLTC    | ERG     | EZR       | GPC3     | KIF5B   | NTRK1  | PAX8    | PRKAR1A | SLC45A3 | SYK      | USP6  |
| BCOR                                              | CD274  | CLTCL1  | ETV1    | FGFR1     | HMG2A    | KMT2A   | NTRK3  | PDGFRB  | RAF1    | SS18    | TAF15    |       |
| BCR                                               | CD74   | CREBBP  | ETV4    | FGFR3     | IL2      | LRI3    | NUP214 | PICALM  | RARA    | SSX1    | TCF12    |       |
| BRAF                                              | CDK6   | CRLF2   | ETV5    | FIP1L1    | ITK      | MECOM   | NUP98  | PLAG1   | RET     | SSX2    | TFE3     |       |
| BRD3                                              | CIC    | CTNNB1  | ETV6    | FOXO1     | JAK2     | MLLT10  | NUTM1  | PML     | ROS1    | SSX4    | TMPRSS2  |       |

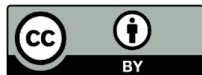

© 2019 by the authors. Licensee MDPI, Basel, Switzerland. This article is an open access article distributed under the terms and conditions of the Creative Commons Attribution (CC BY) license (<http://creativecommons.org/licenses/by/4.0/>).
